# Supplementary material for: Antifungal effects of andrographolide and its combination with amphotericin B against selected fungal pathogens
Source: PeerJ. 2025 Jun 16;13:e19544. doi: 10.7717/peerj.19544 (PMC12178247; doi:10.7717/peerj.19544)
Supplement: Supplemental Information 1 — Both experiments showed the same results. [file peerj-13-19544-s001.xlsx]

## Sheet: Table 1
	Supplementary Table 1: Raw data for MIC and MFC of andrographolide against test isolates
	Fungal isolates	Experiment 1		Experiment 2		Average
		MIC (µg/mL)	MFC (µg/mL)	MIC (µg/mL)	MFC (µg/mL)	MIC (µg/mL)	MFC (µg/mL)
	A. fumigatus	400	800	400	800	400	800
	A. terreus	800	1600	800	1600	800	1600
	A. niger	400	800	400	800	400	800
	M. gypseum	800	>1600	800	>1600	800	>1600
	T. mentagrophytes	400	1600	400	1600	400	1600
	C. albicans	800	>1600	800	>1600	800	>1600
	Note: MIC- minimum inhibitory concentration, MFC- minimum fungicidal concentration. Experiment was done in duplicate, and average was taken.

## Sheet: Table 2
	Supplementary Table 2: Raw data for combined activity of andrographolide (ADR) and amphotericin B (AMB) against test isolates
	Fungal isolates	Experiment 1				Experiment 2				Average
		MICADR (µg/mL)	MICAMB	MICADRC (µg/mL)	MICAMBC (µg/mL)	MICADR (µg/mL)	MICAMB (µg/mL)	MICADRC (µg/mL)	MICAMBC (µg/mL)	MICADR (µg/mL)	MICAMB (µg/mL)	MICADRC (µg/mL)	MICAMBC (µg/mL)
			(µg/mL)
	A. fumigatus	400	4	50	1	400	4	50	1	400	4	50	1
	A. terreus	800	8	200	4	800	8	200	4	800	8	200	4
	A. niger	400	8	100	2	400	8	100	2	400	8	100	2
	M. gypseum	800	16	200	8	800	16	200	8	800	16	200	8
	T. mentagrophytes	400	8	100	2	400	8	100	2	400	8	100	2
	C. albicans	800	4	100	1	800	4	100	1	800	4	100	1
	Note: MICADR- minimum inhibitory concentration of andrographolide alone, MICAMB- minimum inhibitory concentration of amphotericin B alone, MICADRC- minimum inhibitory concentration of andrographolide in combination, MICAMBC- minimum inhibitory concentration of amphotericin B in combination. Experiment was done in duplicate, and the average was taken.
